# Supplementary material for: Automated cell tracking identifies mechanically oriented cell divisions during Drosophila axis elongation
Source: Oxford University Press journal article supplement (doi:10.1242/dev.141473), 2017-02-18
Supplement: dev141473supp.pdf [file dev141473supp.pdf]

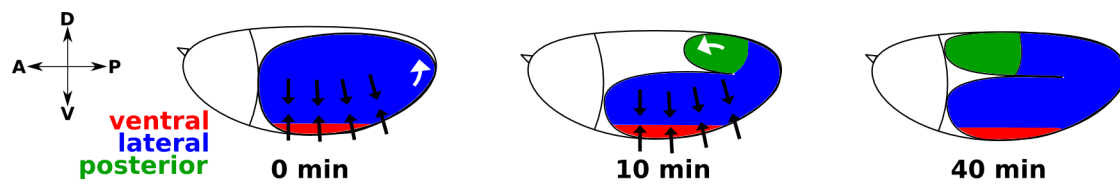

**Figure S1. Basic anatomy and mechanics of germband extension.** Cartoon depicting an embryo during early (left), mid (centre) or late (right) germband extension. The germband is coloured. Different colours indicate distinct cell populations: ventral (red), lateral (blue), and posterior (green). Anterior (A) left, posterior (P) right, dorsal (D) up, ventral (V) down. Black arrows indicate actomyosin-based contractile stresses generated in the germband. White arrows indicate tensile stresses caused by endoderm ingression in the posterior pole of the embryo.

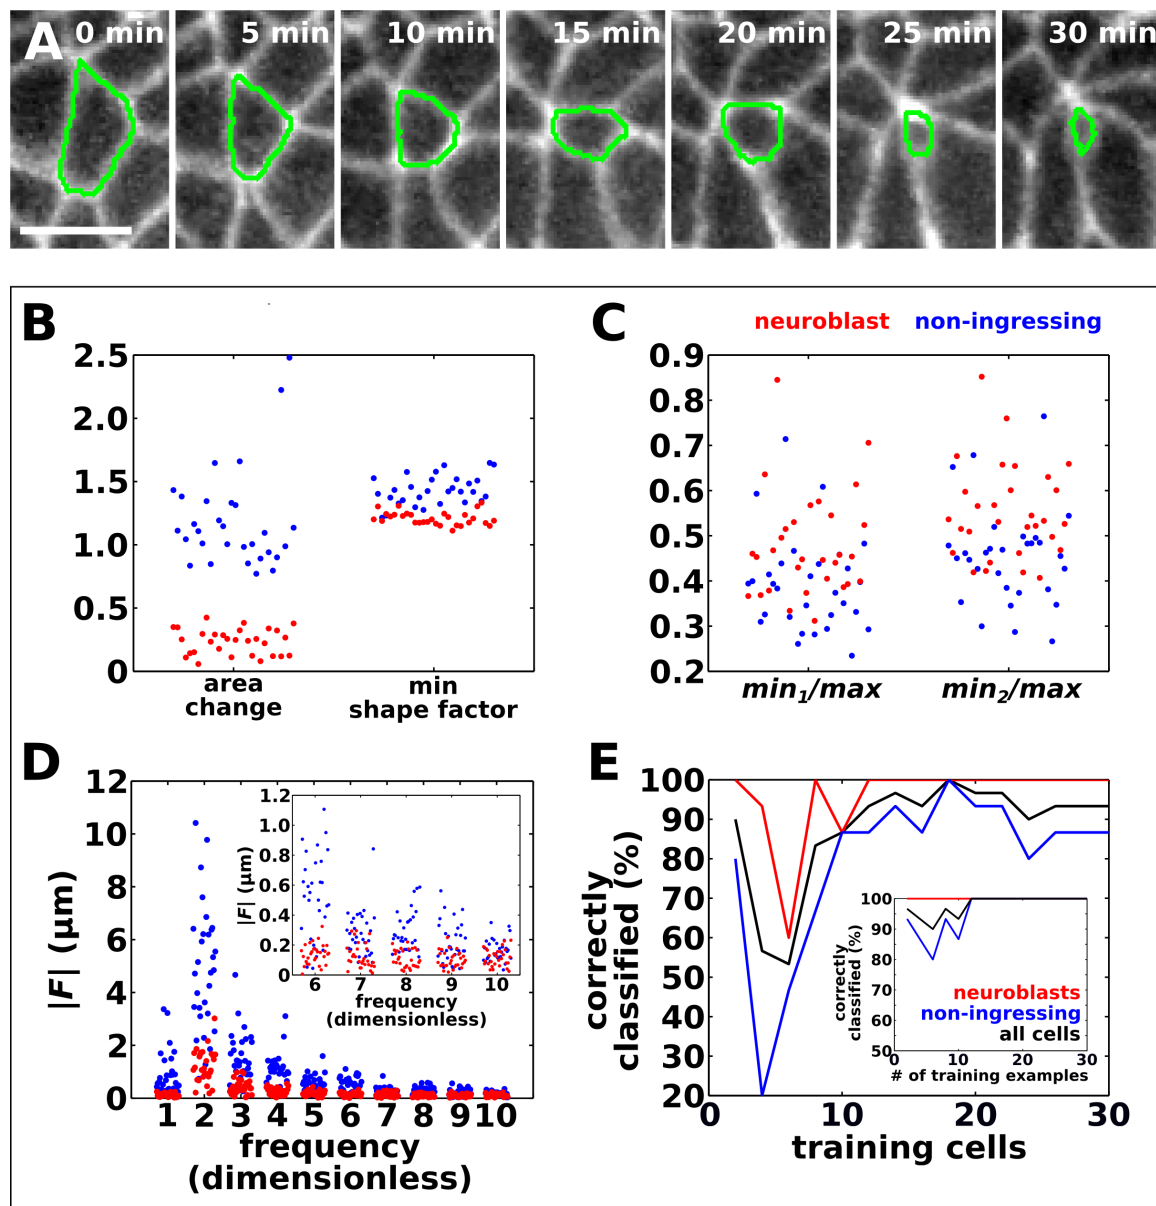

**Figure S2. Ingressing neuroblasts display distinct morphological features. (A)** Neuroblast expressing Gap43:mCherry as it delaminates from the ectoderm. Green shows segmentation results. Bar, 20  $\mu\text{m}$ . Anterior left, ventral down. **(B-D)** Scatter plots of the area change ratio and minimum shape factor (B), minimum-to-maximum cell radii ratios (C), and 1-10 integer components of the Fourier transform of the centroid-polygon distance (D) both for ingressing neuroblasts ( $n = 30$  in 10 embryos, red) and non-ingressing cells ( $n = 36$  in 10 embryos, blue). **(D)** Inset shows the magnitude of frequency components 6-10 with a different Y-axis scale. **(E)** Percent correctly classified neuroblasts (red), non-ingressing (blue), and total (black) cells as a function of the number of cells in the training set (in a 1:1 ratio of neuroblasts to non-ingressing cells). Inset shows percent correctly classified cells using only 6 features (area change, minimum shape factor,  $\min_1/\max$ ,  $\min_2/\max$ , and frequency components 1 and 2).

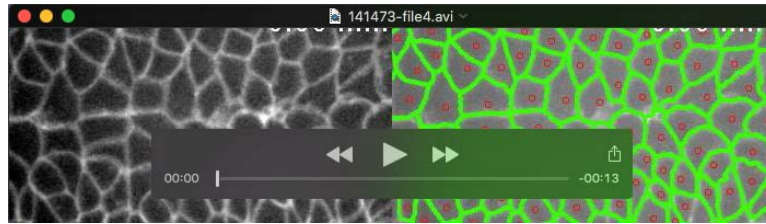

**Movie S1. Integrating image analysis and machine learning allows cell segmentation and tracking in developing embryos.** Germband cells expressing Gap43:mCherry at the final stages of axis elongation. Red circles represent watershed seeds. Green shows segmentation and tracking results. A stack was acquired every 15 s. Anterior left, ventral centre.

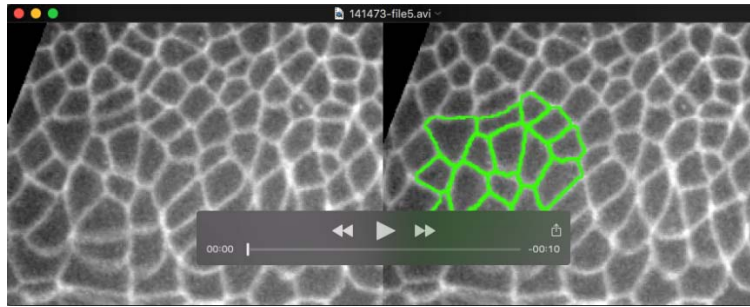

**Movie S2. Image analysis and machine learning can detect ingressing neuroblasts.**

Cells in a stage 7 embryo expressing Gap43:mCherry. Green represents segmentation and tracking results. Red indicates detection of a neuroblast. A stack was acquired every 15 s. Anterior left, ventral down.

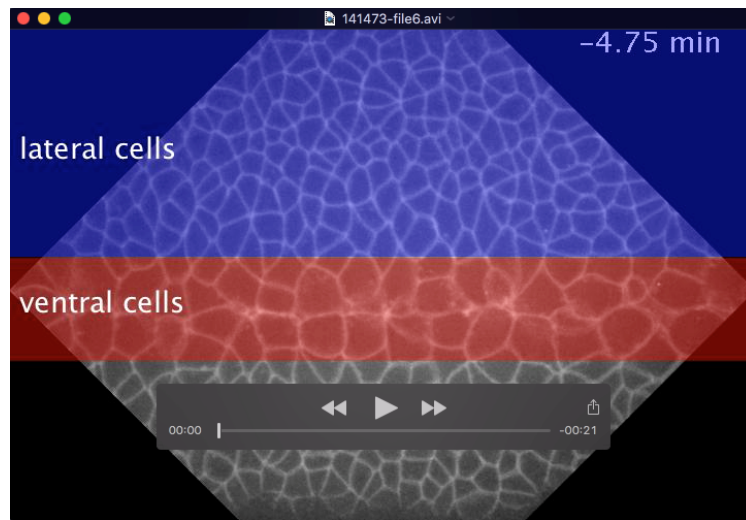

**Movie S3. Cells on the anterior end of the germband divide during *Drosophila* axis elongation.** Germband cells expressing Gap43:mCherry at the final stages of axis elongation. Red ventral, blue lateral. A stack was acquired every 15 s. Anterior left, ventral down.

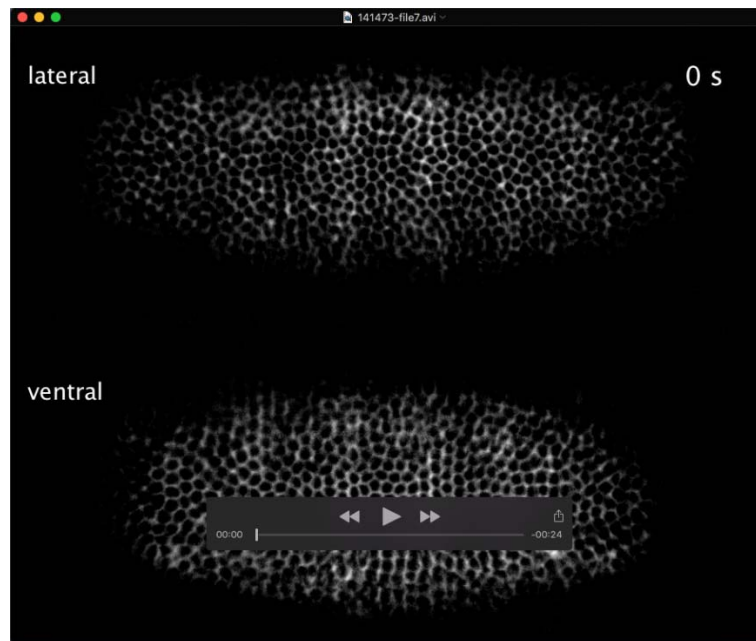

**Movie S4. Ventral cells divide at the same time as lateral cells.** Germband cells expressing Gap43:mCherry during axis elongation acquired using dual-illumination, light sheet microscopy. Cyan arrow indicates first lateral division, red arrow shows first ventral division. A stack was acquired every 25 s. Anterior left, ventral down (top) or centre (bottom).

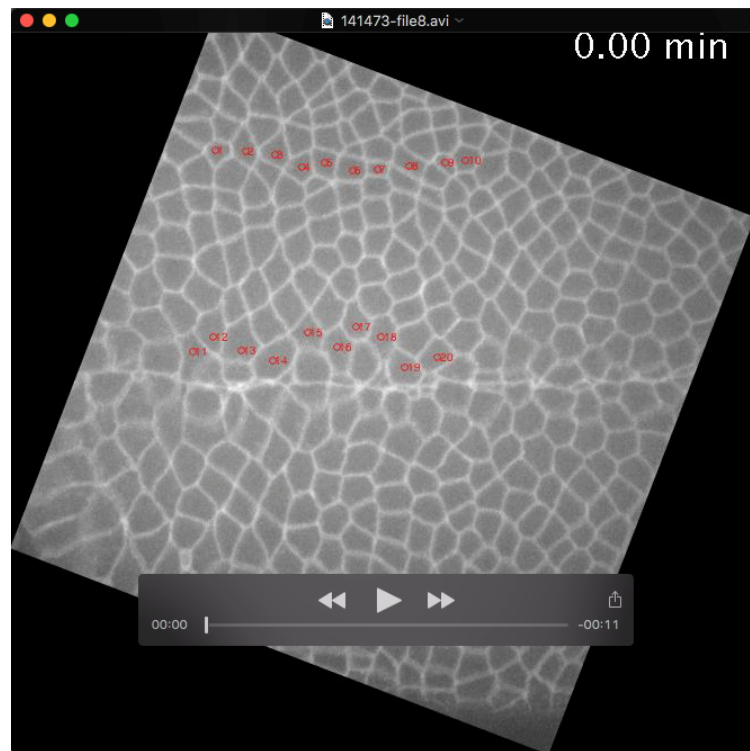

**Movie S5. Ventral cells do not intercalate during axis elongation.** Germband cells expressing Gap43:mCherry during axis elongation. Red circles track cells. Cells 1-10 are lateral cells, cells 11-20 are ventral cells. A stack was acquired every 15 s. Anterior left, ventral down.

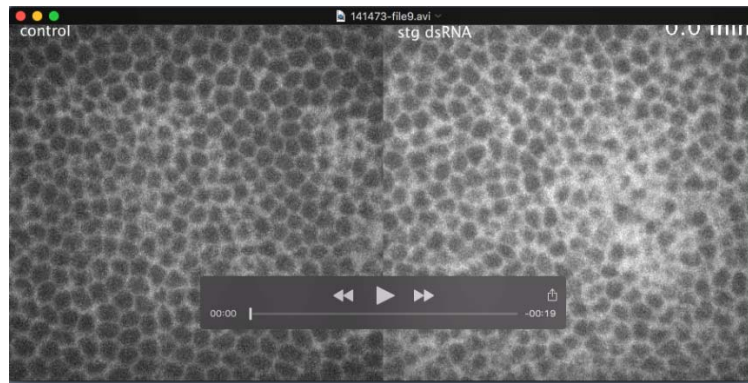

**Movie S6. *stg* dsRNA eliminates germband divisions.** Germband cells expressing Gap43:mCherry during axis elongation in a water-injected control (left) or an embryo injected with dsRNA against *stg* (right). A stack was acquired every 30 s. Anterior left, ventral down.
